# Supplementary material
Source: Springer Nature journal article supplement (https://www.springermedizin.de/resource/supplementary/12874_2012_864_MOESM3_ESM.pdf/9432676)

**A) Original data**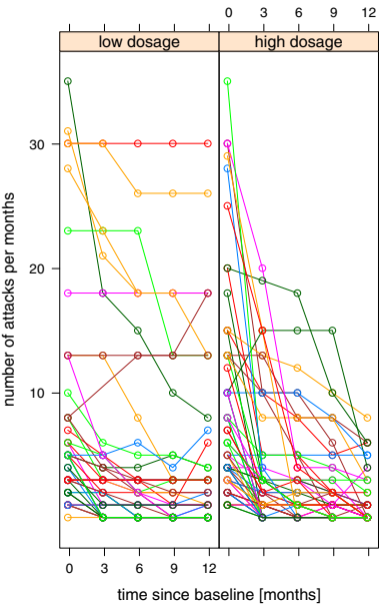**B) Poisson, I**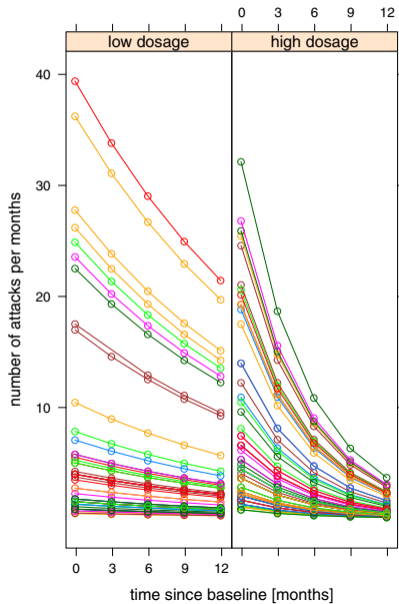**C) Poisson, IS**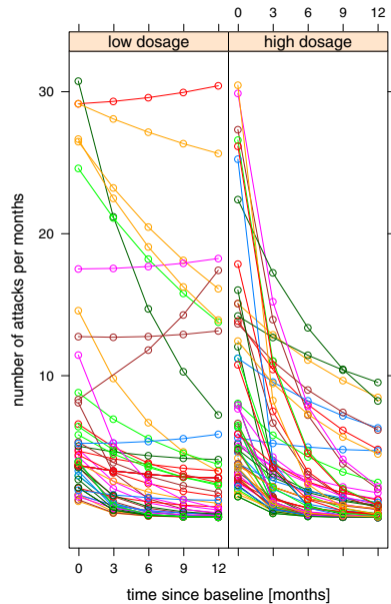

Supplement: MOESM3 [file 9432676]
